# Supplementary material for: Genetic incorporation of non-canonical amino acid photocrosslinkers in Neisseria meningitidis: New method provides insights into the physiological function of the function-unknown NMB1345 protein
Source: PubMed Central journal article supplement (PMC7458321; doi:10.1371/journal.pone.0237883), 2020-08-31

**A**

1 MKKPLISVAAALLGVALGTPYYLGVKAESLTQQQKILQEAGFLTVESHQ 50  
 51 YERGWFTSTETTIVIRLKPPELLNARKYLPDNLKTVLEQPVTLVNHITHGP 100  
 101 FAGGFGTQAYIETEFKYAPETEKVLERFFGKQAPVSLANTVYFNGSGKME 150  
 151 VSVPAFDYEELSGIRLHWEGLTGKTVYQKGFKSYRNSYDAPLFKIKLADK 200  
 201 GDAAFEKAHFDSETSDGINPLALGSSNLTLEKFSLEWKEGVDYINVKLNEL 250  
 251 VNLVTDLQIGAFINPNGSIAPSK**IEVGXLAFSTK**TGESGSFINSEGQFRF 300  
 301 DTLVYGNEKYGPLDIHIAAEHLASALTVLKRKFAQISAKKMTEEQIRND 350  
 351 LIAAVKGEASGLFTNNPVLDIKTFRFTQPSGKIDVGGKIMFKDMKKEDLN 400  
 401 QLGLMLKKTEADIRMSIPQKMLEDLAVSQAGNIFSVNAEDEAEGRASLDD 450  
 451 INETLRLMVDSTVQSMAREKYLTNLNGDQIDTAISLKNQLKLNKTLQNE 500  
 501 PEPDFDEGGMVSEPQQGGSGGSGGSWSHPQFEKGGGSGGGSGGGSGGSWSHPQ 550  
 551 FEKGGGGGGHHHHHH 564

**B**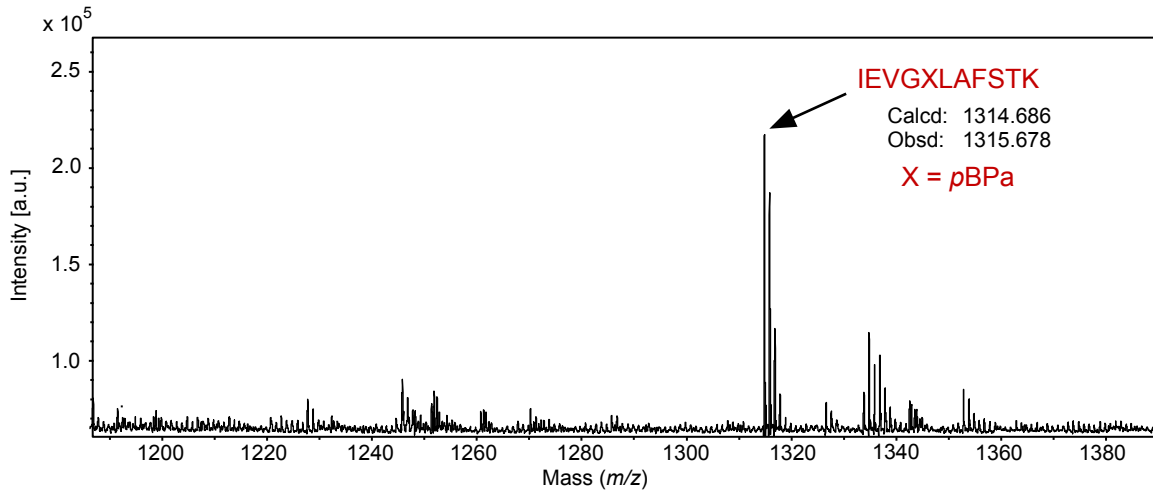**C**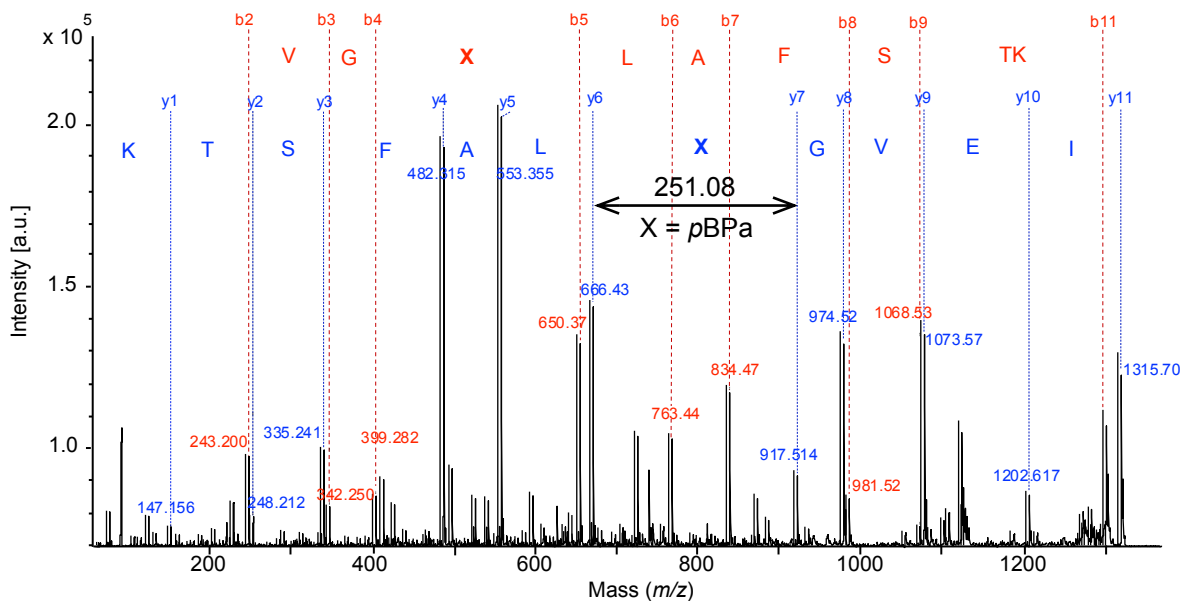

Supplement: pone.0237883.s005.pdf [file pone.0237883.s005.pdf]
