# Supplementary material for: Genetic incorporation of non-canonical amino acid photocrosslinkers in Neisseria meningitidis: New method provides insights into the physiological function of the function-unknown NMB1345 protein
Source: PubMed Central journal article supplement (PMC7458321; doi:10.1371/journal.pone.0237883), 2020-08-31

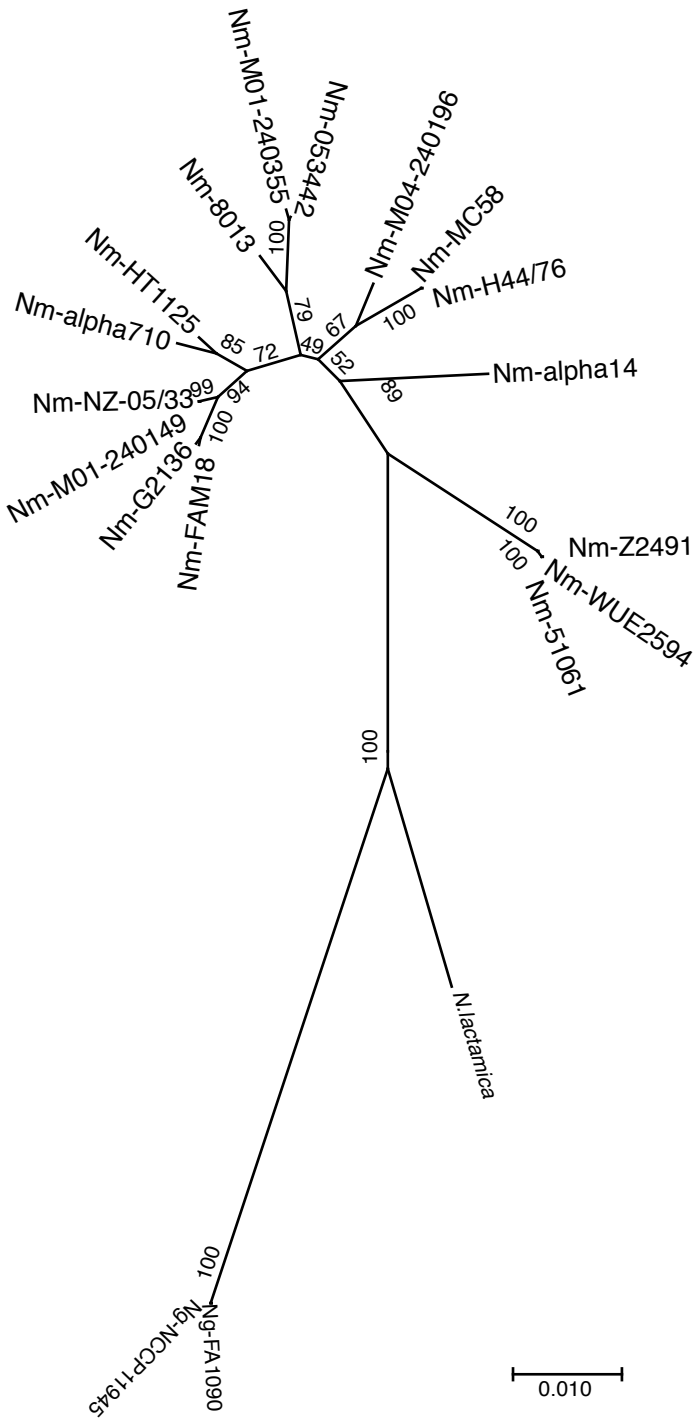

Supplement: pone.0237883.s013.pdf [file pone.0237883.s013.pdf]
