# Supplementary material for: Genetic incorporation of non-canonical amino acid photocrosslinkers in Neisseria meningitidis: New method provides insights into the physiological function of the function-unknown NMB1345 protein
Source: PubMed Central journal article supplement (PMC7458321; doi:10.1371/journal.pone.0237883), 2020-08-31
Supplement: pone.0237883.s019.pdf [file pone.0237883.s019.pdf]

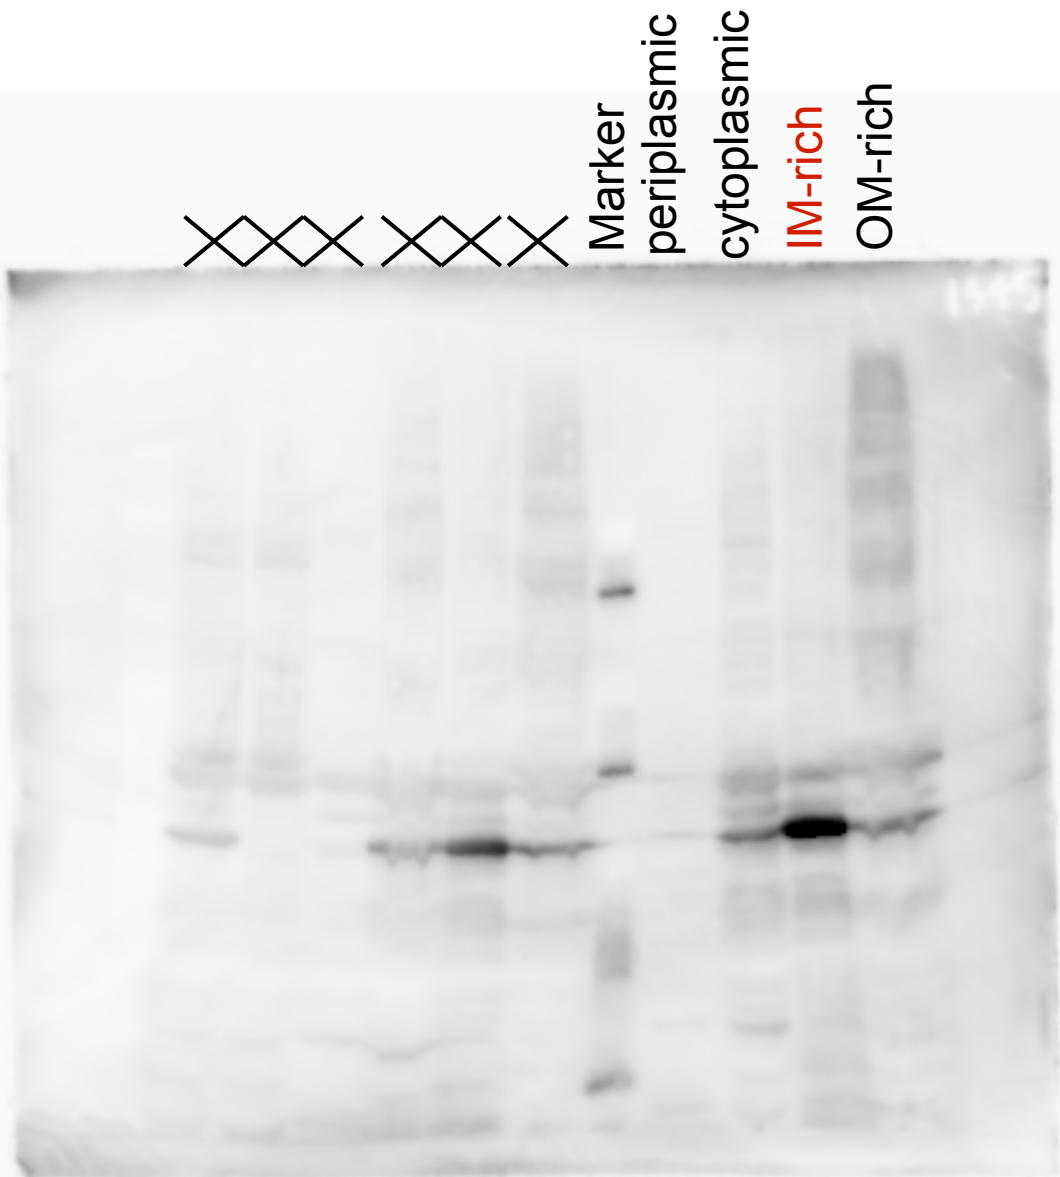

@ Detected by anti -PamA rabbit serum & anti-rabbit-HRP conjugate-2nd antibody

@ Captured by Chemiluminescence imaging system: FUSION SOLO 5 (M&S)

@ Use by cut out left-half of the gel to show the fractionation of PamA protein in *N. meningitidis*

Fig 2A\_raw\_image

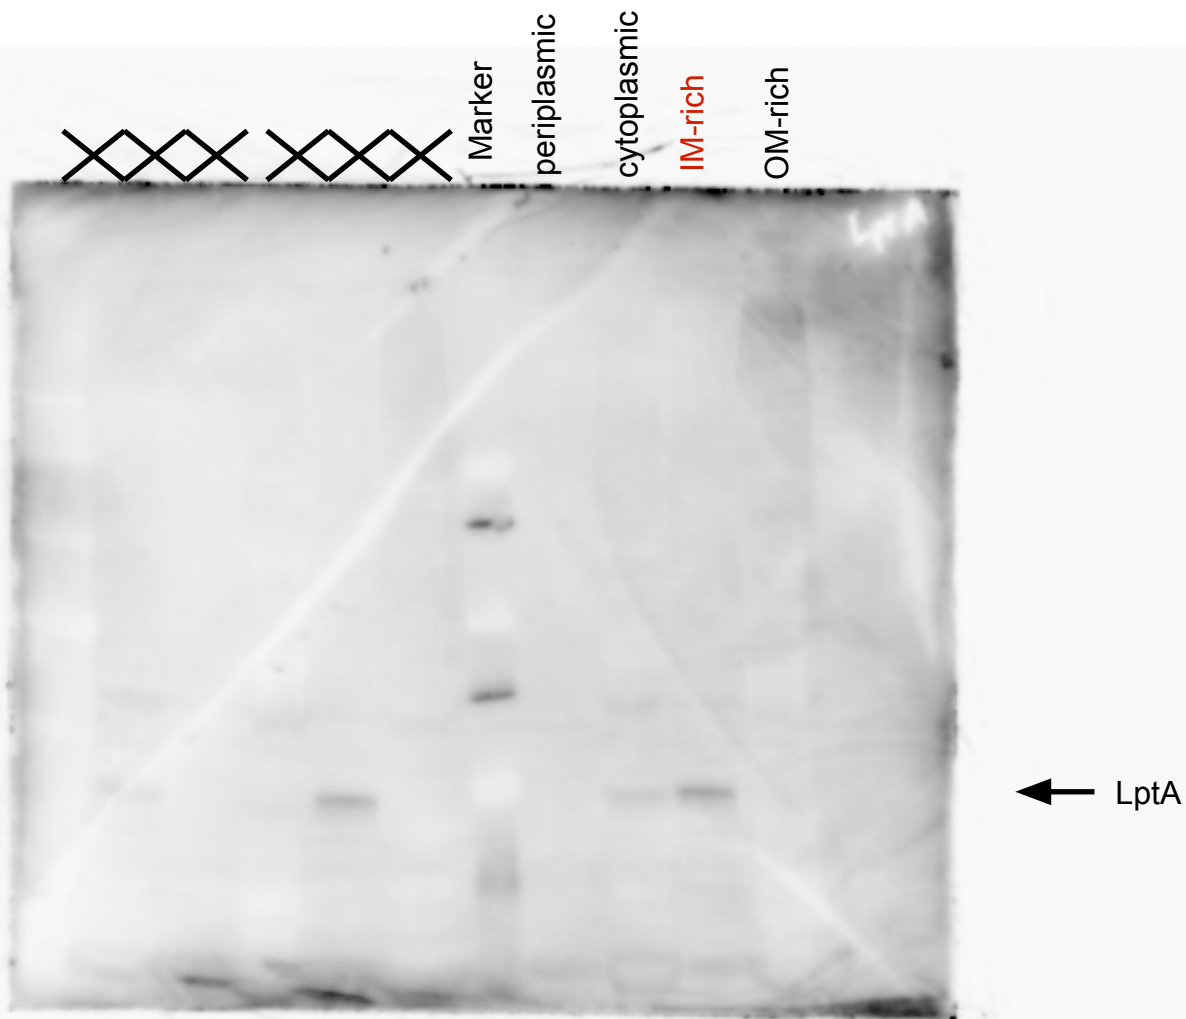

@ Detected by anti-LptA rabbit serum & anti-rabbit-HRP conjugate-2nd antibody

@ Captured by Chemiluminescence imaging system: FUSION SOLO 5 (M&S)

@ Use by cut out right-half of the gel to show the fractionation of LptA protein  
(inner membrane protein) in *N. meningitidis*

Fig 2A-2\_raw\_image

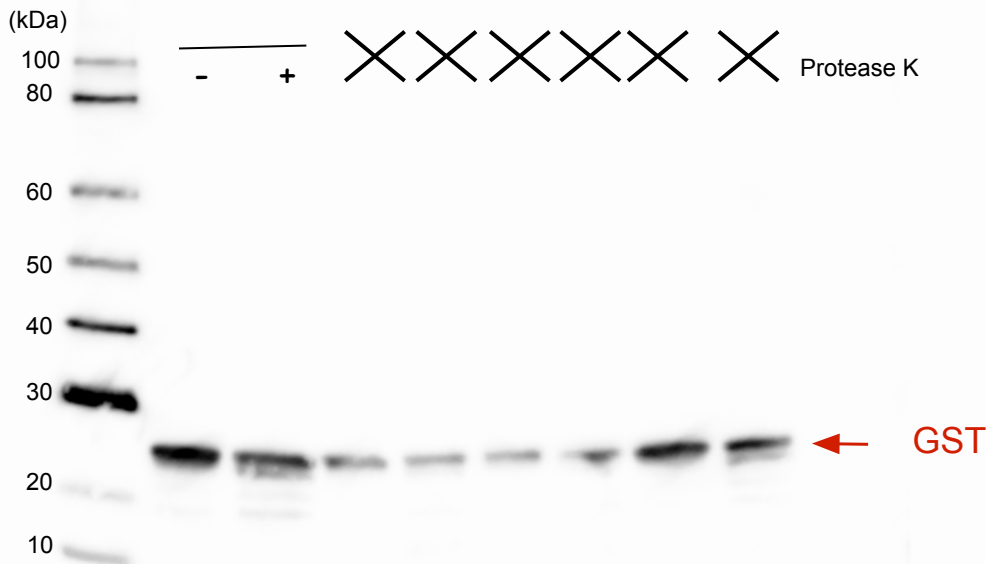

- @ Detected meningococcal spheroplasted meningococci digested by Protease K followed by SDS-PAGE & Western blotting
- @ Detected by anti-GST mAb & anti-mouse-HRP conjugate-2nd antibody
- @ Captured by Chemiluminescence imaging system: FUSION SOLO 5 (M&S)
- @ Use by cutting out the left part of bands to show the digestion of GST protein in *N. meningitidis*

Fig 2D\_raw\_image

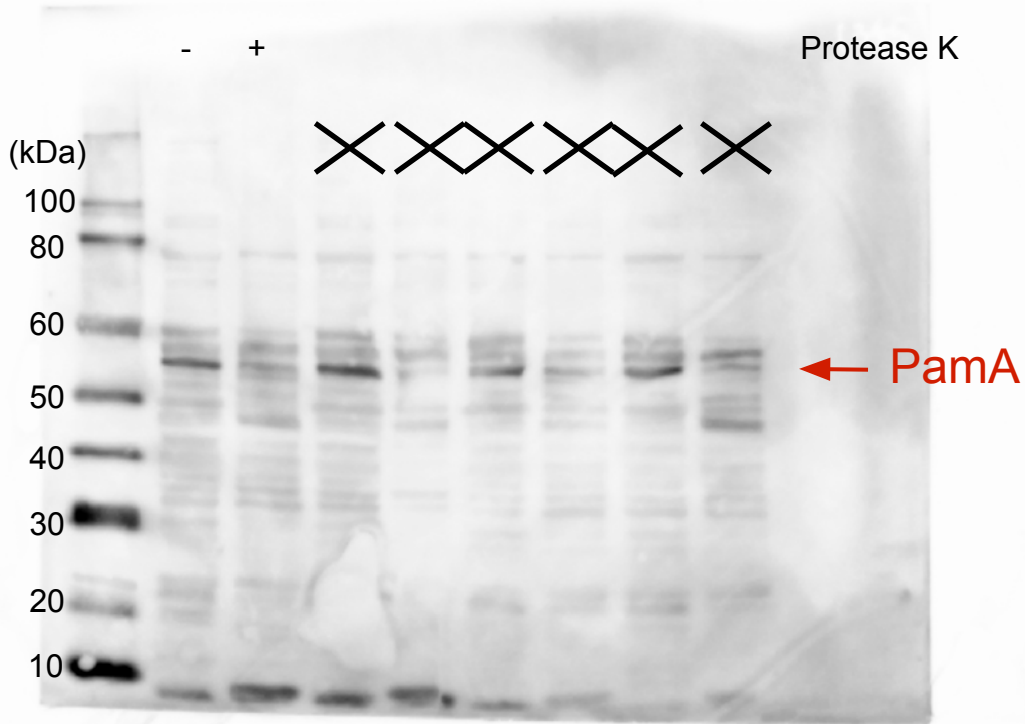

@ Detected spheroplasted meningococci digested by Protease K followed by SDS-PAGE & Western blotting

@ Detected by anti-PamA rabbit serum & anti-rabbit-HRP conjugate-2nd antibody

@ Captured by Chemiluminescence imaging system: FUSION SOLO 5 (M&S)

@ Use by cutting out the left part of the image to show the digestion of PamA protein

Fig 2E\_raw\_image



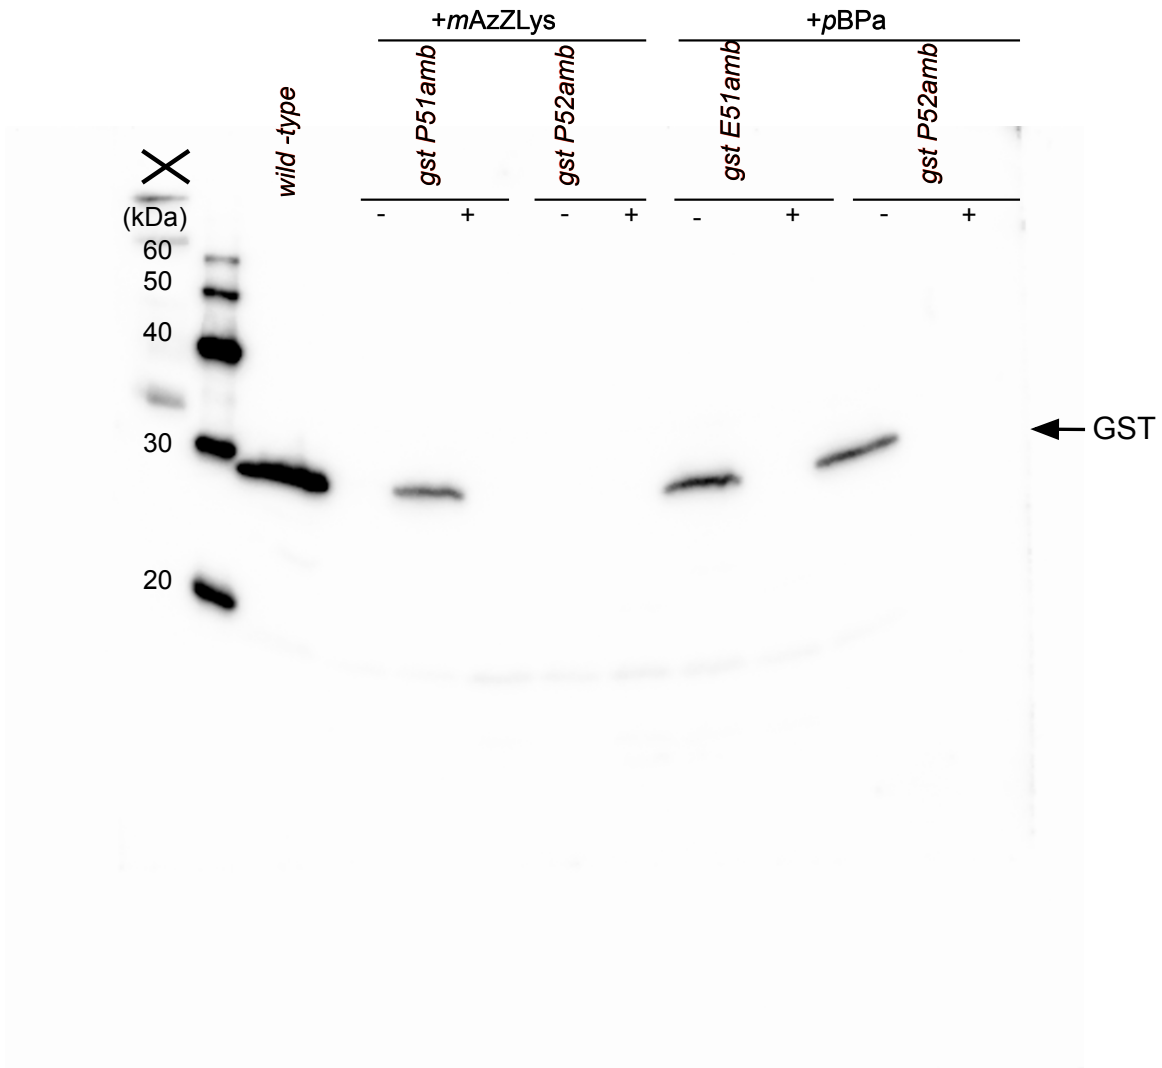

@ Efficiency of incorporation of ncAAs into *gst P51amb* or *P52amb* against wt GST by SDS-PAGE & Western blotting

@ Detected by anti-GST mAb & anti-mouse-HRP conjugate-2nd antibody

@ Captured by Chemiluminescence imaging system: FUSION SOLO 5 (M&S)

@ Used by cutting out to remove margin of the image

Fig 3B\_raw\_image

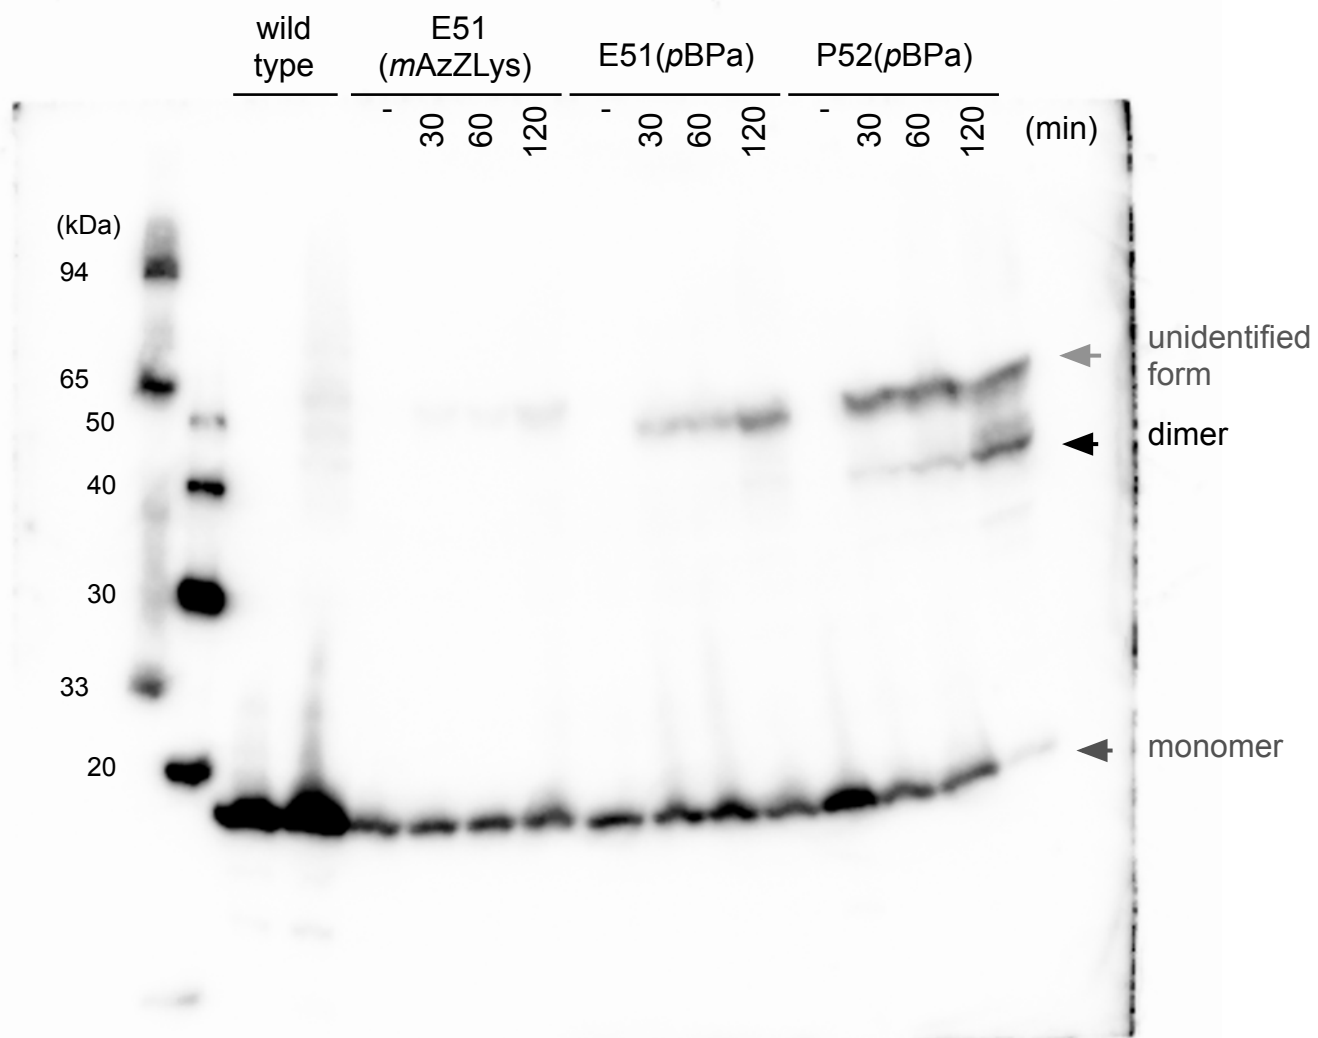

@ Efficiency of crosslinking with ncAAs in GST E51amb and P52amb monitored by Western blotting  
 @ Detected by anti-GST mAb & anti-mouse-HRP conjugate-2nd antibody  
 @ Captured by Chemiluminescence imaging system: FUSION SOLO 5 (M&S)  
 @ Used by cutting out margin of the image

Fig 3C\_raw\_image

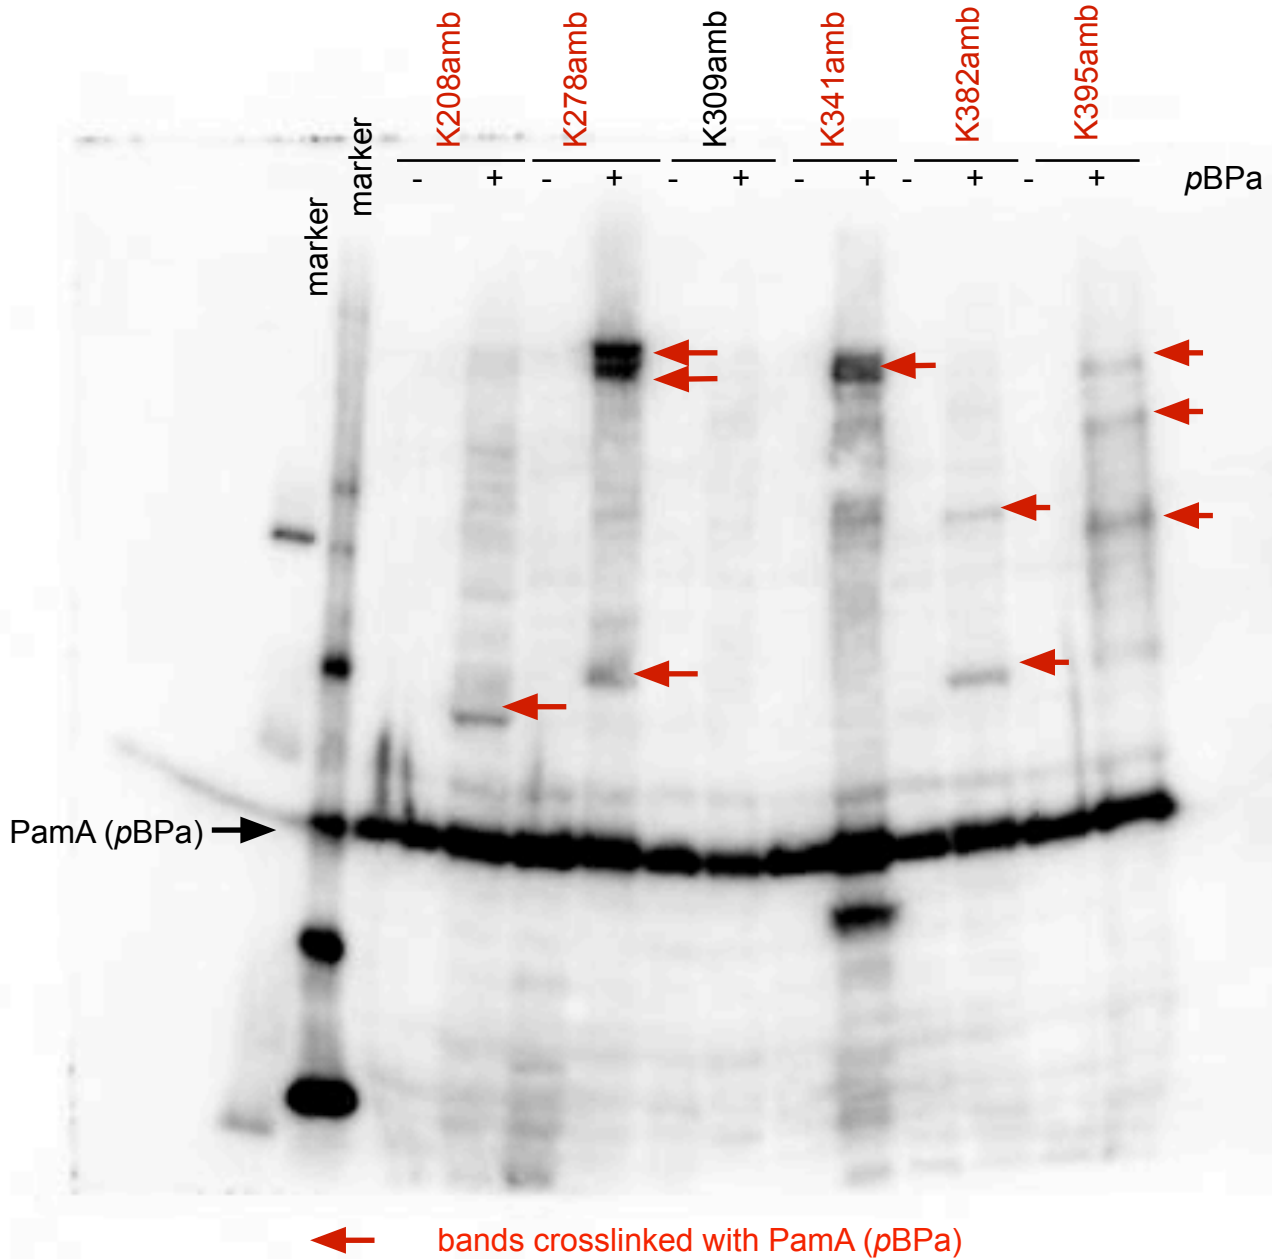

@ re-examination of samples used in S3 Fig by SDS-PAGE & Western blotting  
 @ Detected by anti -(His)<sub>6</sub> mAb & anti-mouse-HRP conjugate-2nd antibody  
 @ Captured by Chemiluminescence imaging system: FUSION SOLO 5 (M&S)  
 @ Used this panel without any modification

Fig 4\_raw\_image

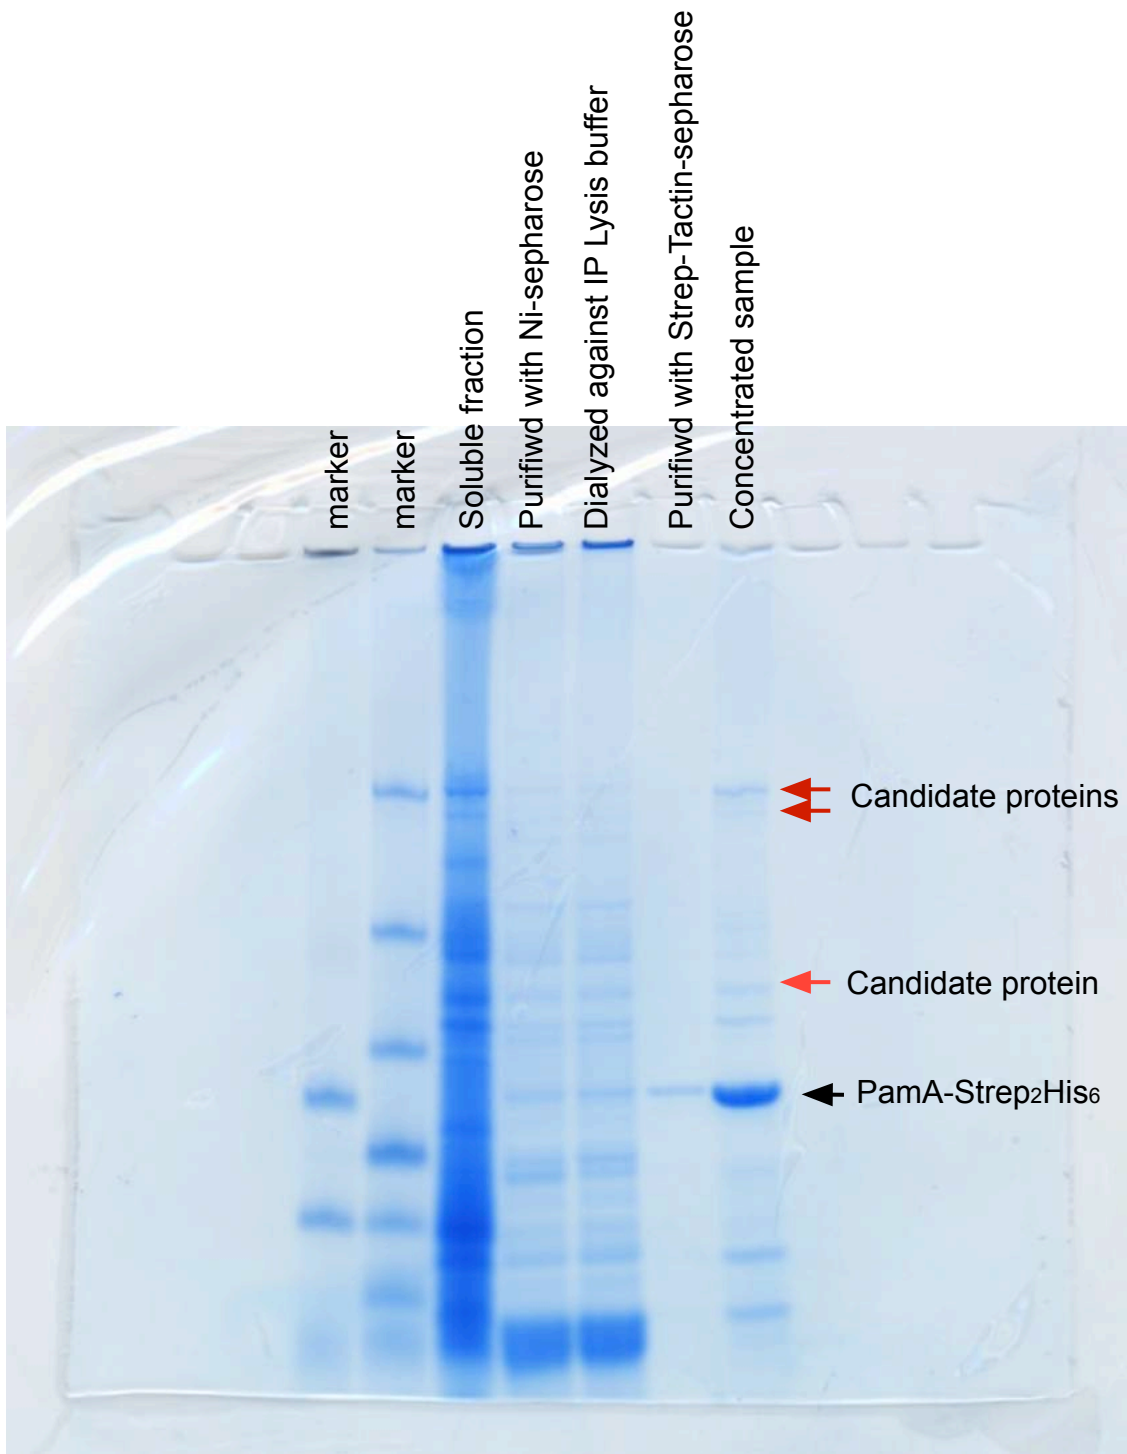

@ Samples purified with His resin & StrepTactin resin and analyzed by SDS-PAGE  
@ Visualized by CBB staining  
@ captured by a general scanner  
@ Used by cutting out the center of the image

Fig 5A\_raw\_image

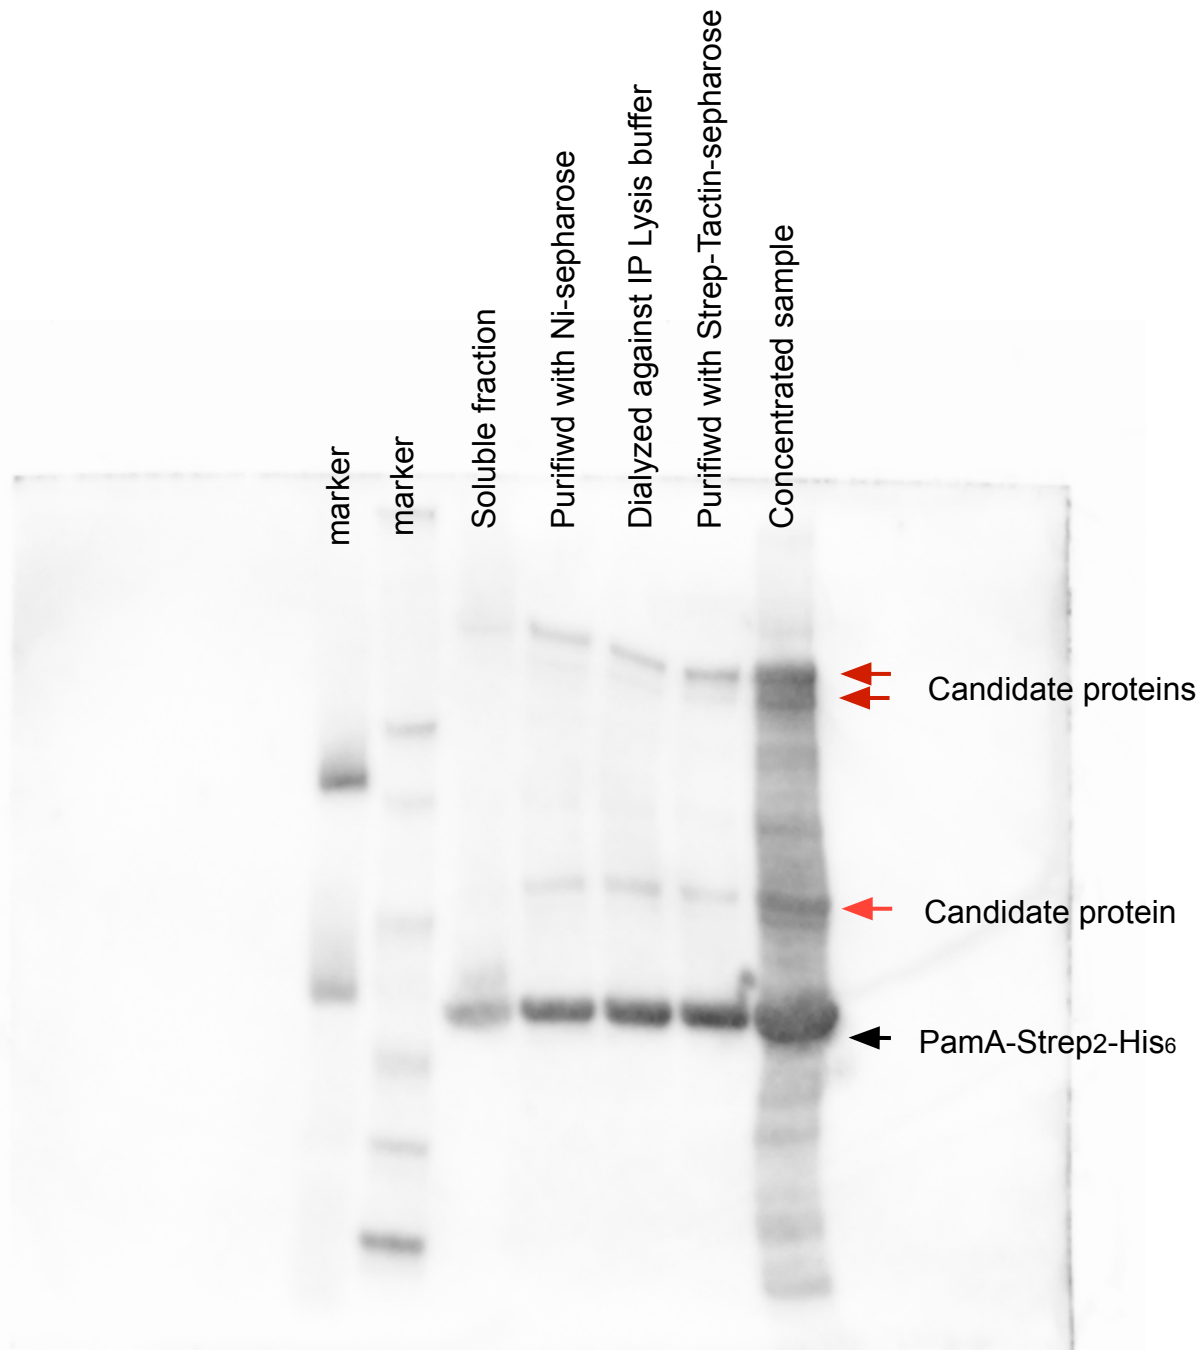

@ Purified samples with His resin & StrepTaction by SDS-PAGE & Western blotting

@ Detected by anti-(His)6 mAb & anti-mouse-HRP conjugate-2nd antibody

@ Captured by Chemiluminescence imaging system: FUSION SOLO 5 (M&S)

@ Used by cutting out the center of the image

Fig 5B\_raw\_image

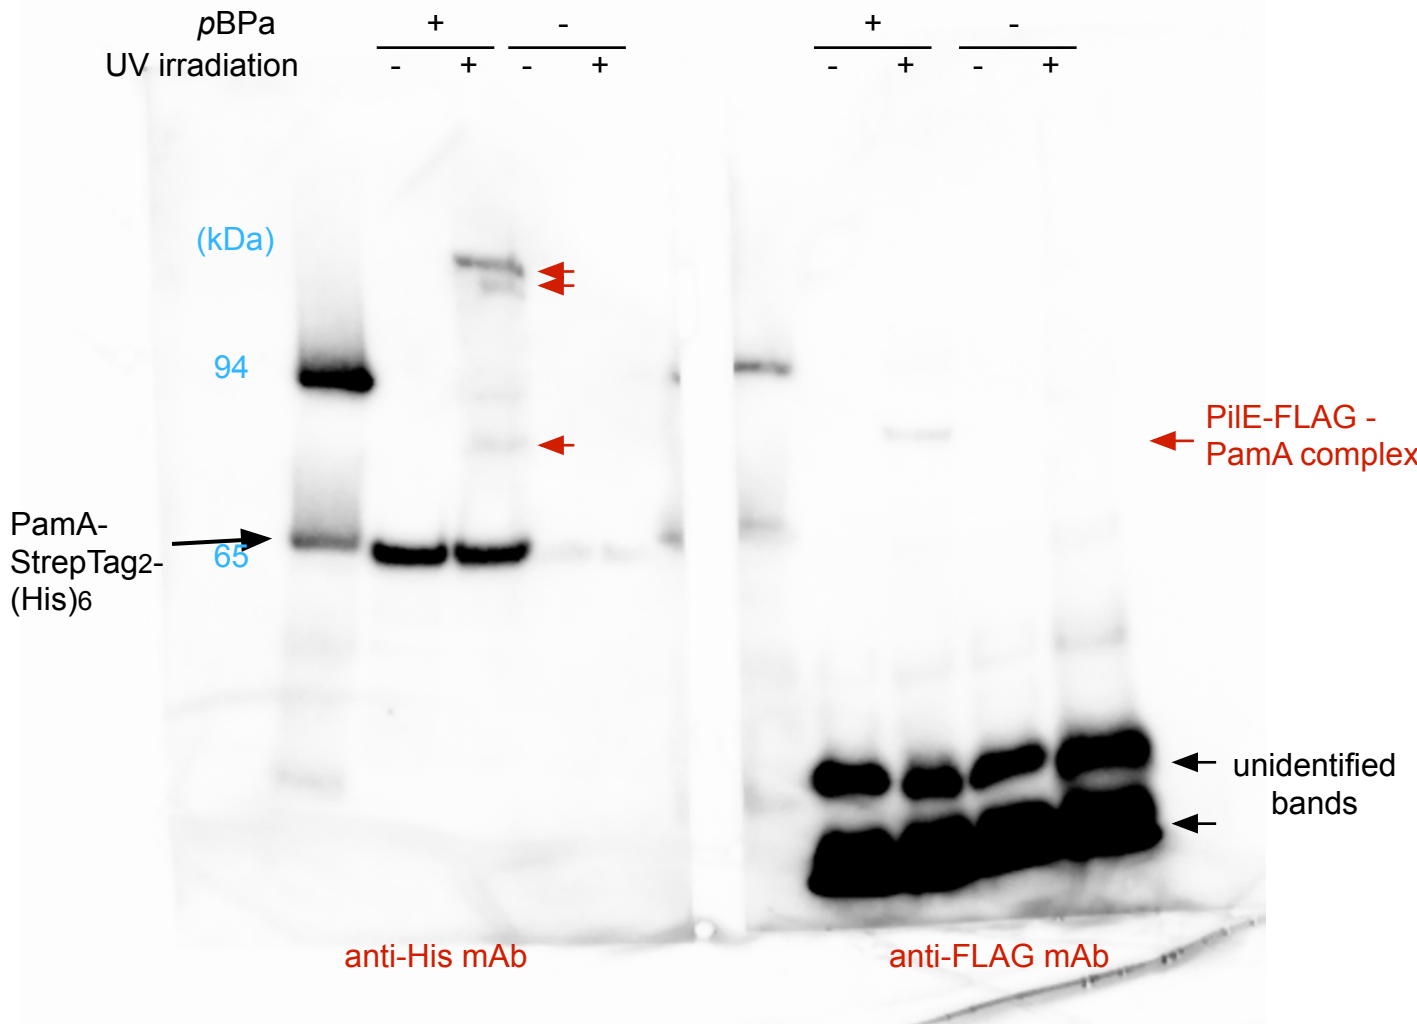

- @ Purified crosslinked samples with His resin by SDS-PAGE & Western blotting
- @ Detected by anti-(His)<sub>6</sub> & FLAG mAbs & anti-mouse-HRP conjugate-2nd antibody
- @ Captured by Chemiluminescence imaging system: FUSION SOLO 5 (M&S)
- @ Used by cutting out the upper part of the image

Fig 5C\_raw\_image

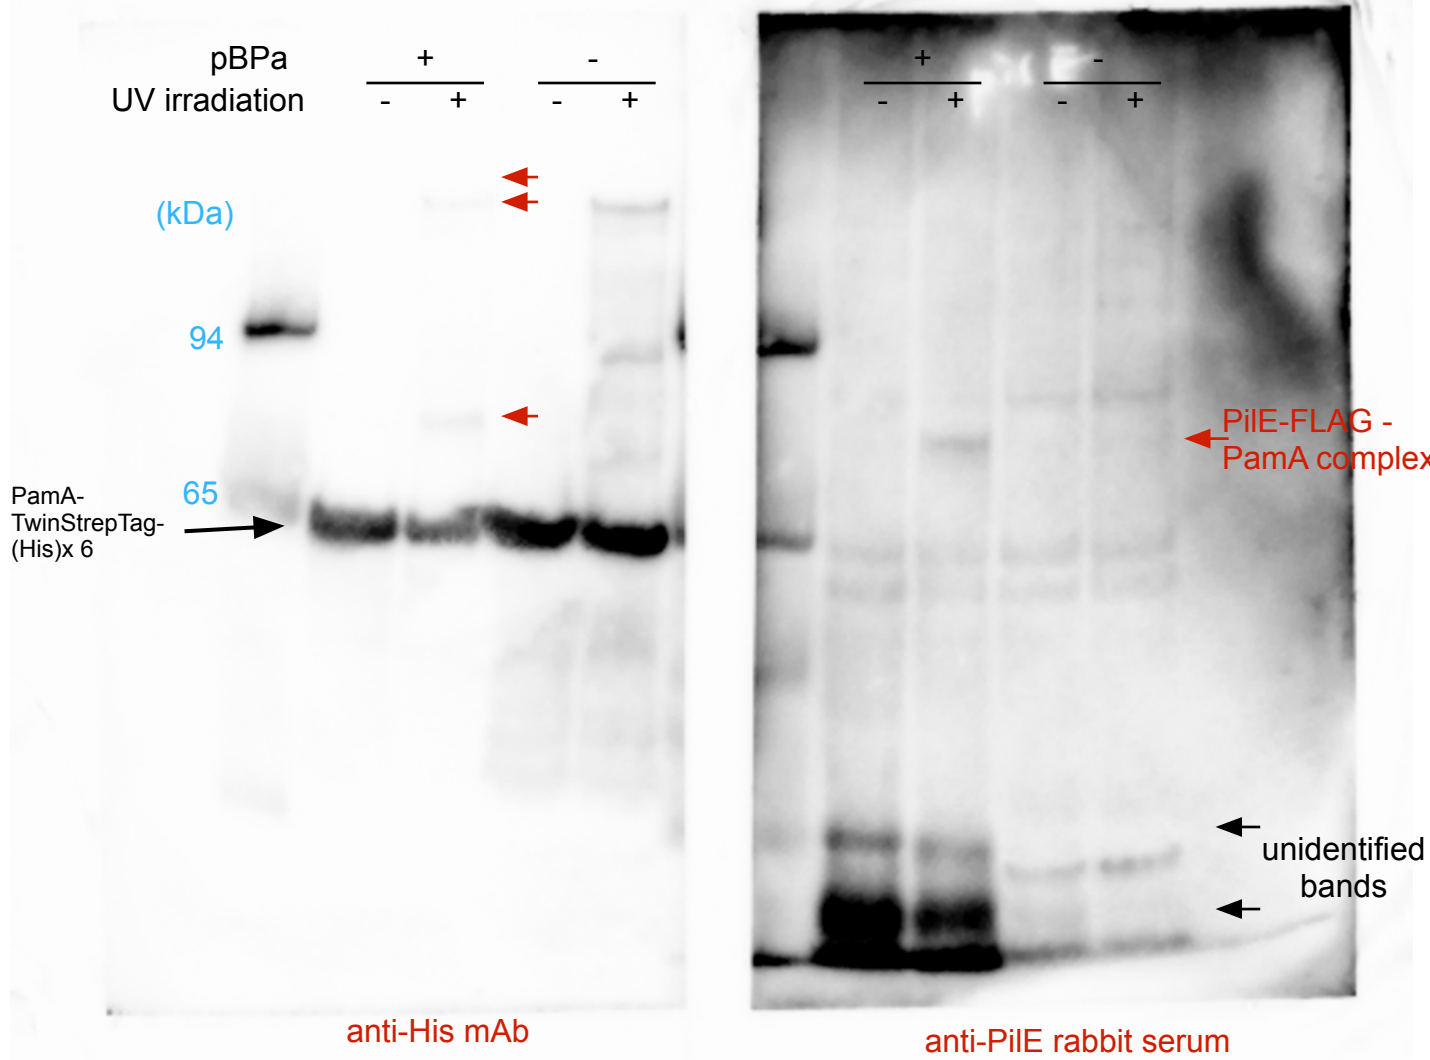

@ Purified crosslinked samples with His resin by SDSP-AGE & Western blotting  
 @ Detected by anti -(His)6 mAb & anti PiIE rabbit serum & anti-mouse/rabbit-HRP conjugate-2nd antibody  
 @ Captured by Chemiluminace imaging system: FUSION SOLO 5 (M&S)  
 @ Used by cutting out the center of the image

Fig 5D\_raw\_image

*pilE-ermC* translational fusion

Anti-(His)<sub>6</sub>  
mAb

PamA K278 (pBP<sub>a</sub>)  
-PilE complex

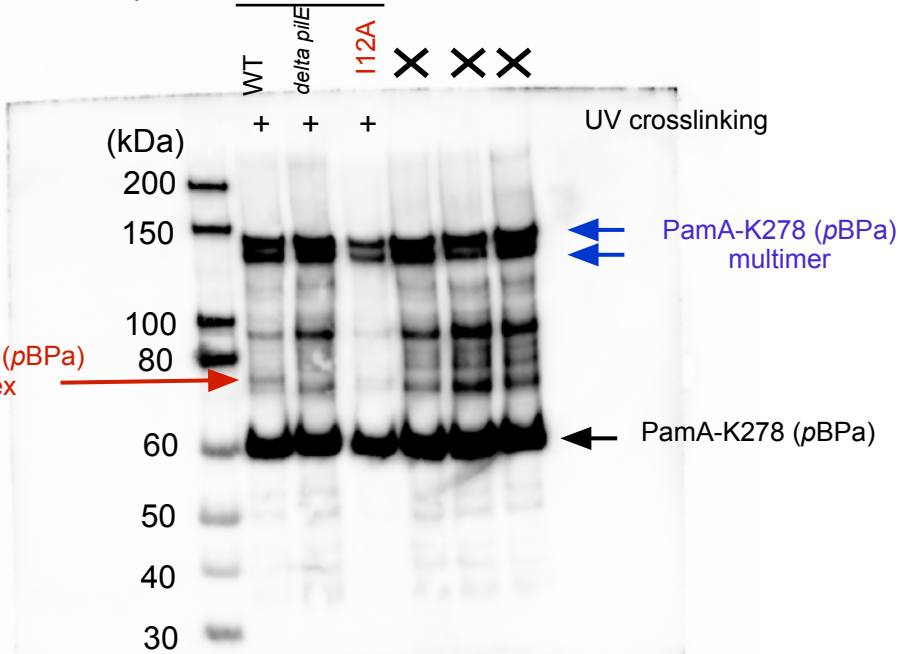

*pilE-ermC* translational fusion

Anti-PilE  
rabbit serum

PamA K278 (pBP<sub>a</sub>)  
-PilE complex

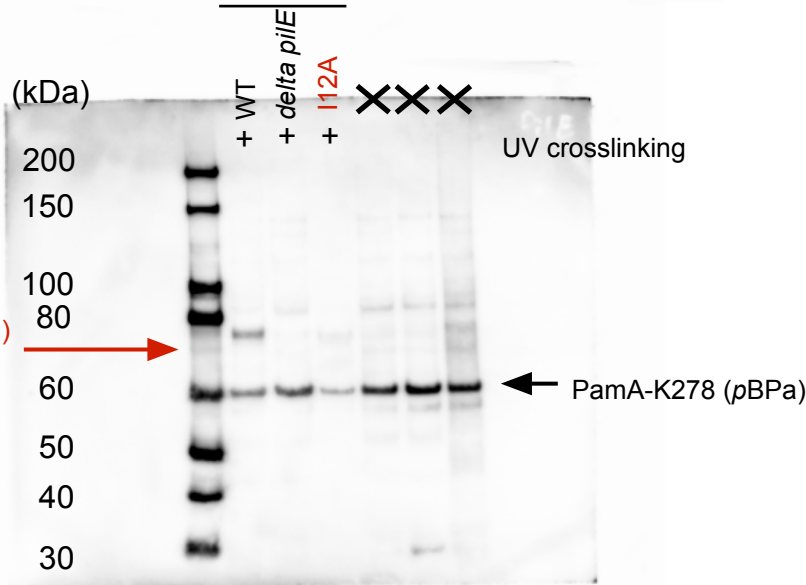

@ Purified crosslinked samples with His resin by SDS-PAGE & Western blotting

@ Detected by anti-(His)<sub>6</sub> mAb & anti-PilE rabbit serum & anti-mouse/rabbit-HRP conjugate-2nd antibody

@ Captured by Chemiluminescence imaging system: FUSION SOLO 5 (M&S)

@ Used by cutting out the left part of the gel



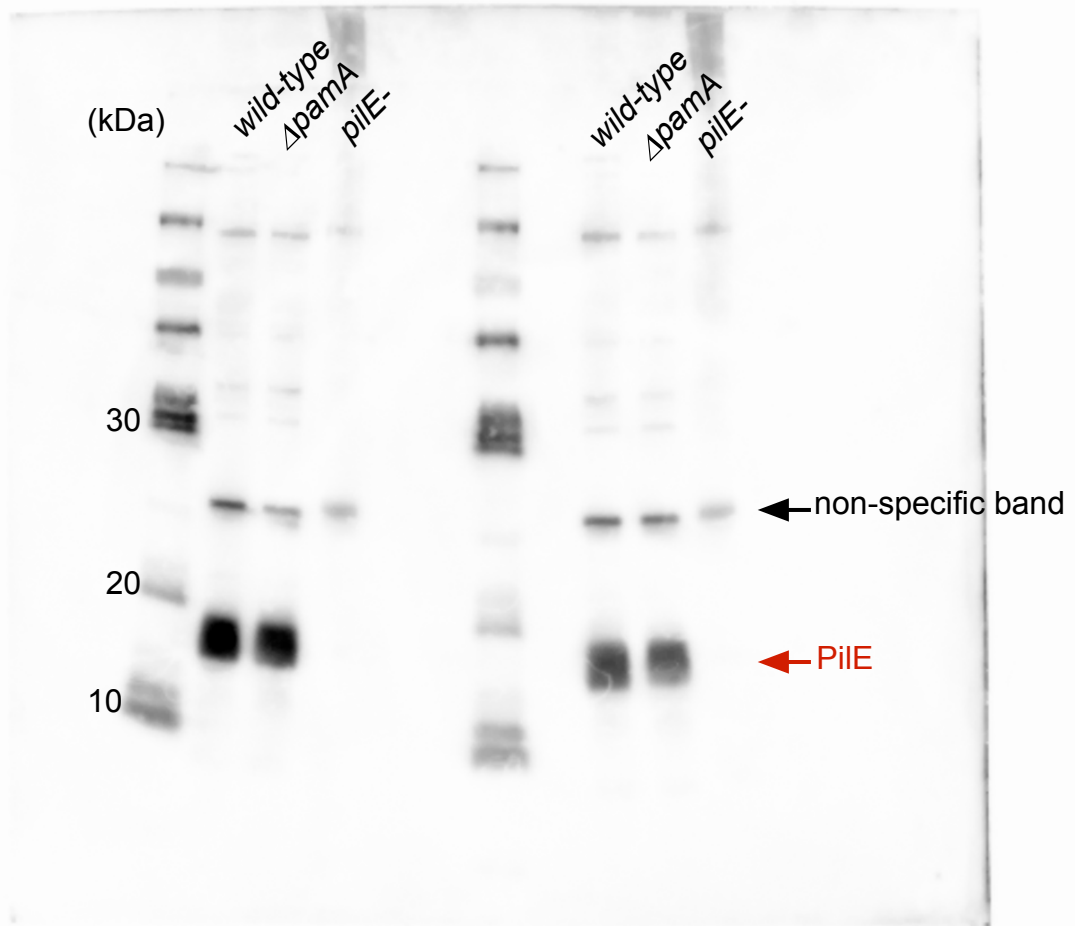

- @ PiE expression in these *N. meningitidis* strains by SDS-PAGE & Western blotting
- @ Detected by anti-PiE rabbit serum & anti-rabbit-HRP conjugate-2nd antibody
- @ Captured by Chemiluminescence imaging system: FUSION SOLO 5 (M&S)
- @ Used by cutting out the left part of the image

Fig 7B\_raw\_image

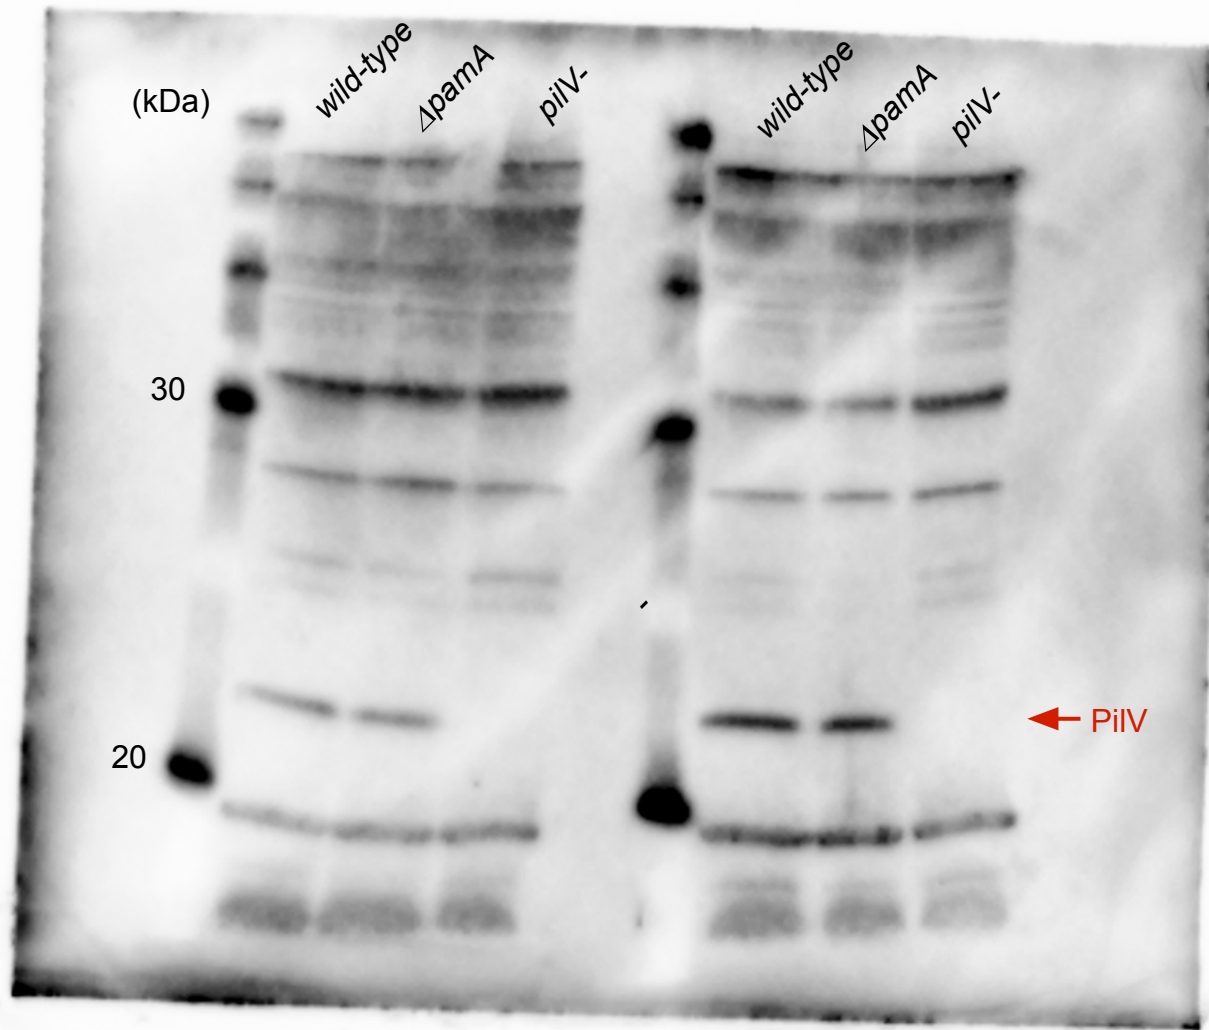

- @ PiIV expression in these *N. meningitidis* strains by SDS-PAGE & Western blotting
- @ Detected by anti-PiIV rabbit serum & anti-rabbit-HRP conjugate-2nd antibody
- @ Captured by Chemiluminescence imaging system: FUSION SOLO 5 (M&S)
- @ Used by cutting out the right part of the image

Fig 7C\_raw\_image

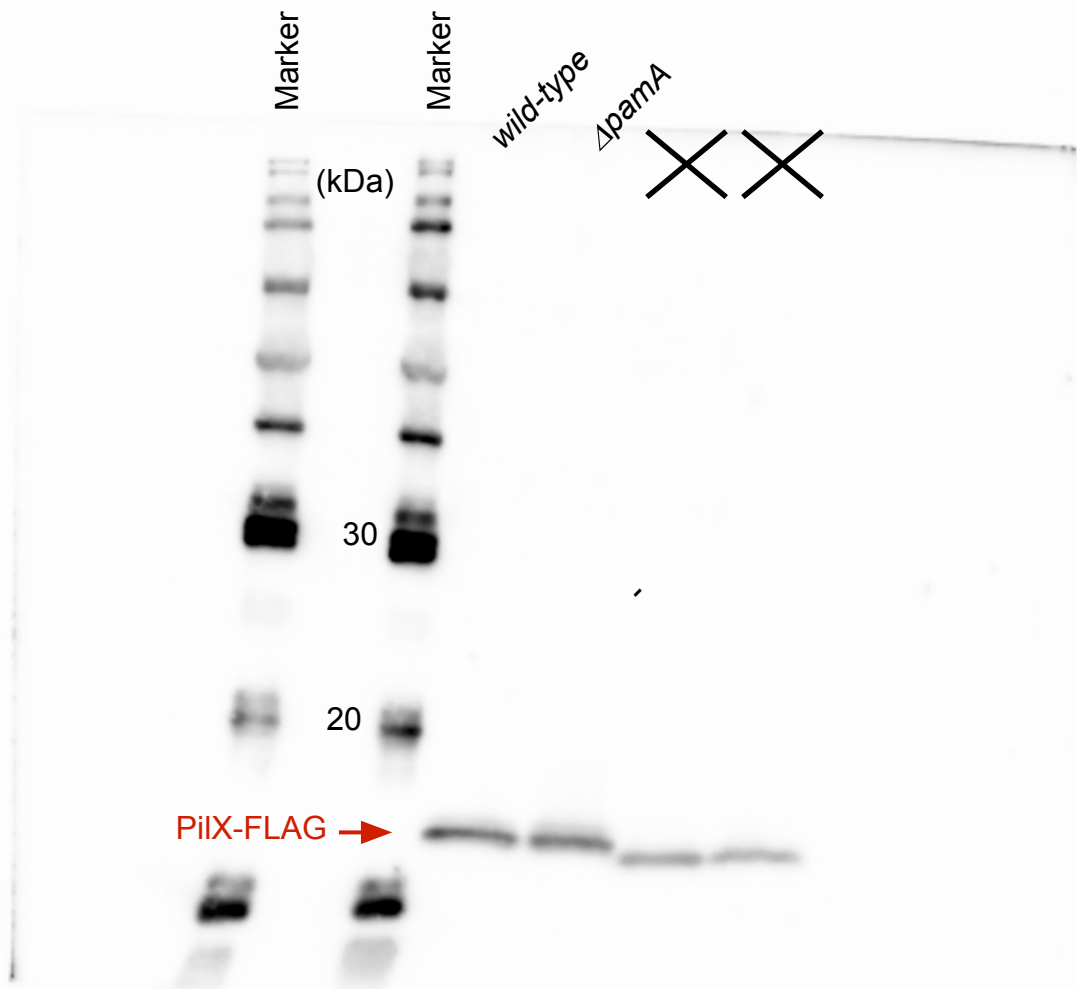

- @ PiIX-FLAG expression in these *N. meningitidis* strains by SDS-PAGE & Western blotting
- @ Detected by anti-FLAG mAb & anti-mouse-HRP conjugate-2nd antibody
- @ Captured by Chemiluminescence imaging system: FUSION SOLO 5 (M&S)
- @ Used by cutting out the middle part of the image

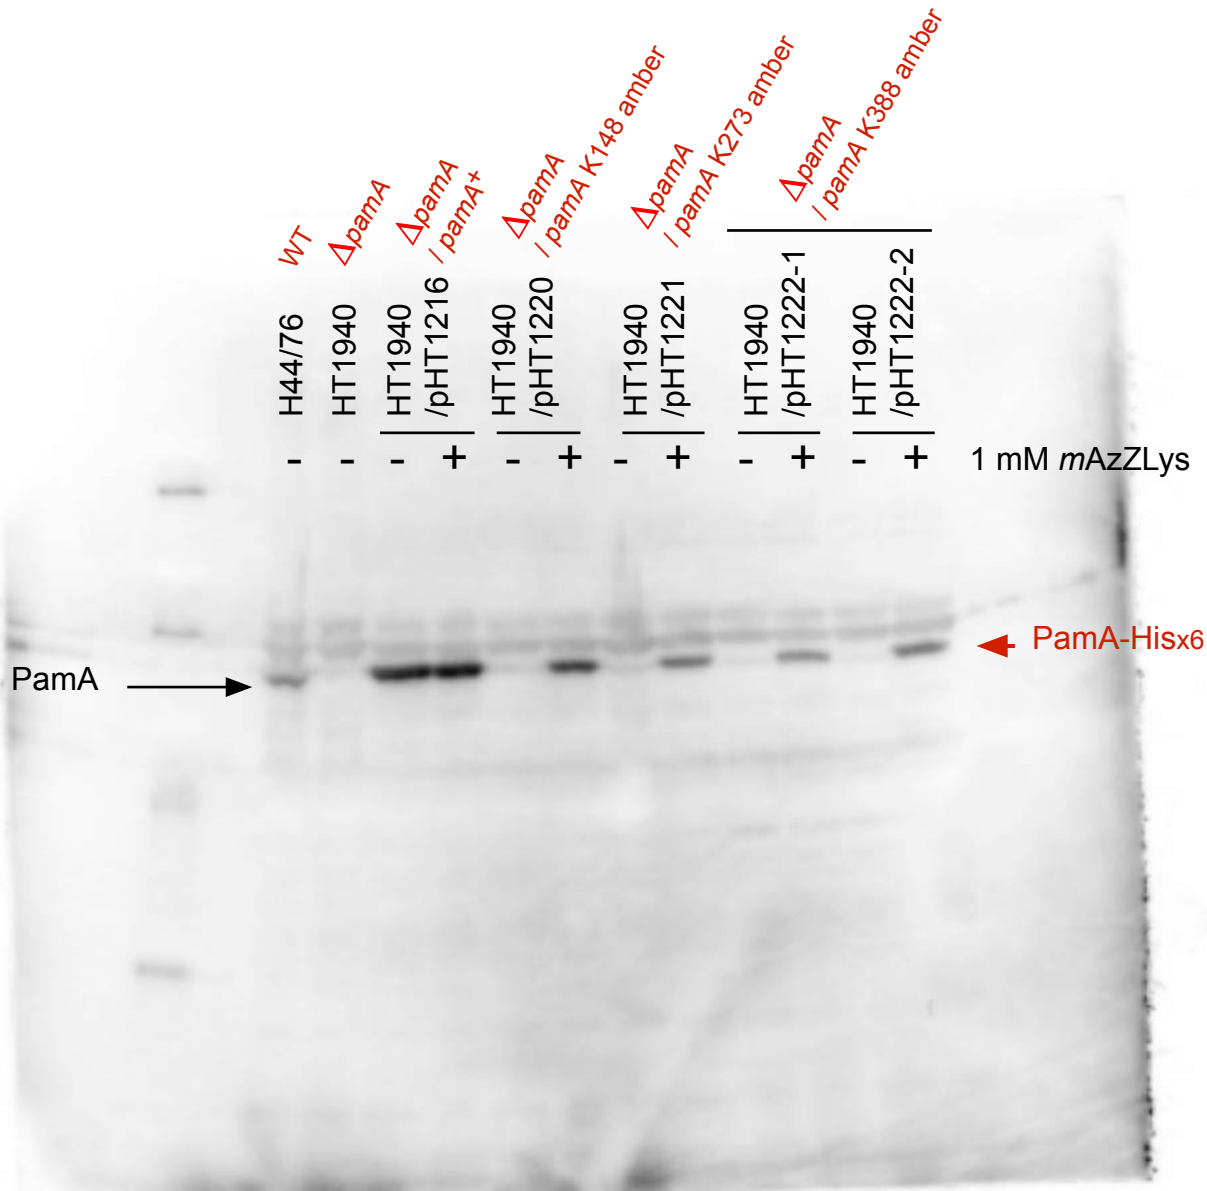

*laclq-Ptac-pyIRS (Y306A/384F)/T + pamA*  
allele on IncQ

- @ mAzZLys-dependent expression of PamA amber mutants by SDS-PAGE & Western blotting
- @ Detected by anti-PamA rabbit serum & anti-rabbit-HRP conjugate-2nd antibody
- @ Captured by Chemiluminace imaging system: FUSION SOLO 5 (M&S)
- @ Used by cutting out the left part of the gel

$\Delta$ pamA / pamA +  
 HT1940 / pHT1216  
 + / -  
 $\Delta$ pamA / pamA K148 amber  
 HT1940 / pHT1220  
 + / -  
 $\Delta$ pamA / pamA K273 amber  
 HT1940 / pHT1221 / pamA K273 amber  
 + / -  
 $\Delta$ pamA / pamA K388 amber  
 HT1940 / pHT1222 / pamA K388 amber  
 + / -

UV irradiation

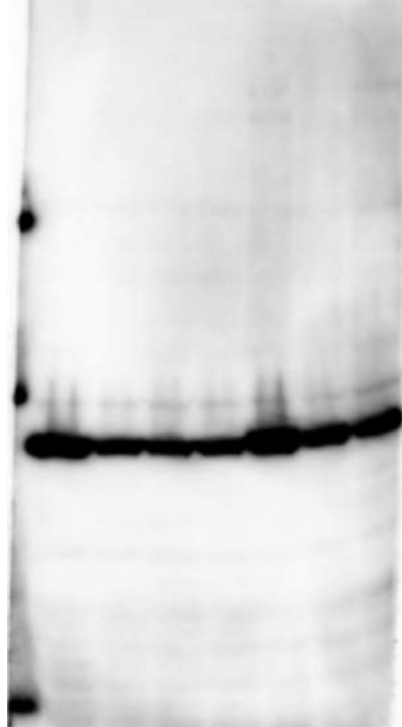

↗  
 ↘  
 Crosslinked candidates

← PamA His x6

@ UV crosslinked band to the PamA protein containing *mAzZLys* in *N. meningitidis* by SDS-PAGE & Western blotting

@ Detected by anti-(His)<sub>6</sub> mAb & anti-mouse-HRP conjugate-2nd antibody

@ Captured by Chemiluminescence imaging system: FUSION SOLO 5 (M&S)

@ Used this image directly

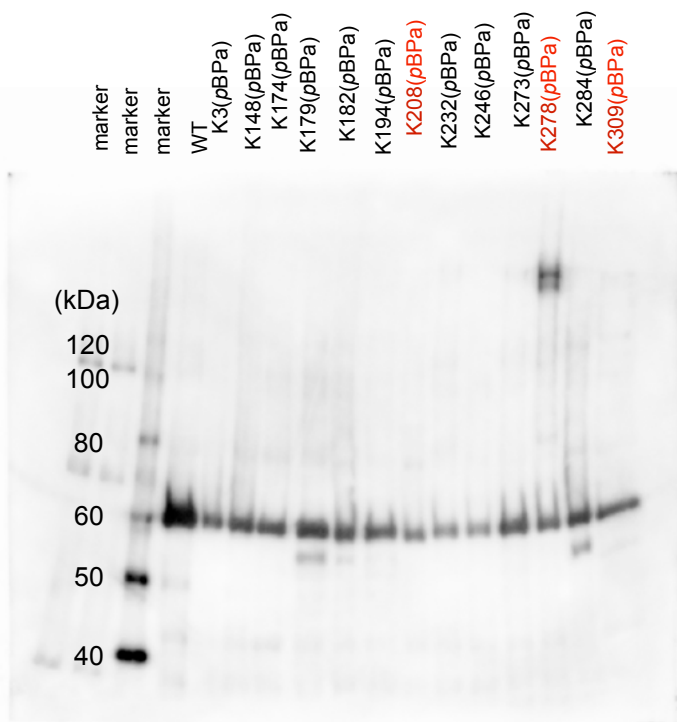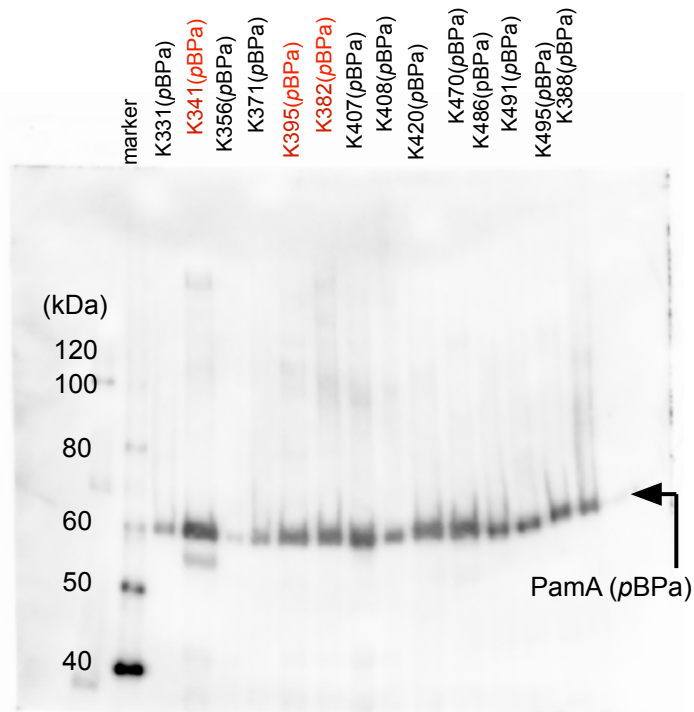

- @ Purified samples with His resin & analyzed by SDS-PAGE & Western blotting
- @ Detected by anti-(His)<sub>6</sub> mAb & anti-mouse-HRP conjugate-2nd antibody
- @ Captured by Chemiluminescence imaging system: FUSION SOLO 5 (M&S)
- @ Use this image without any modification

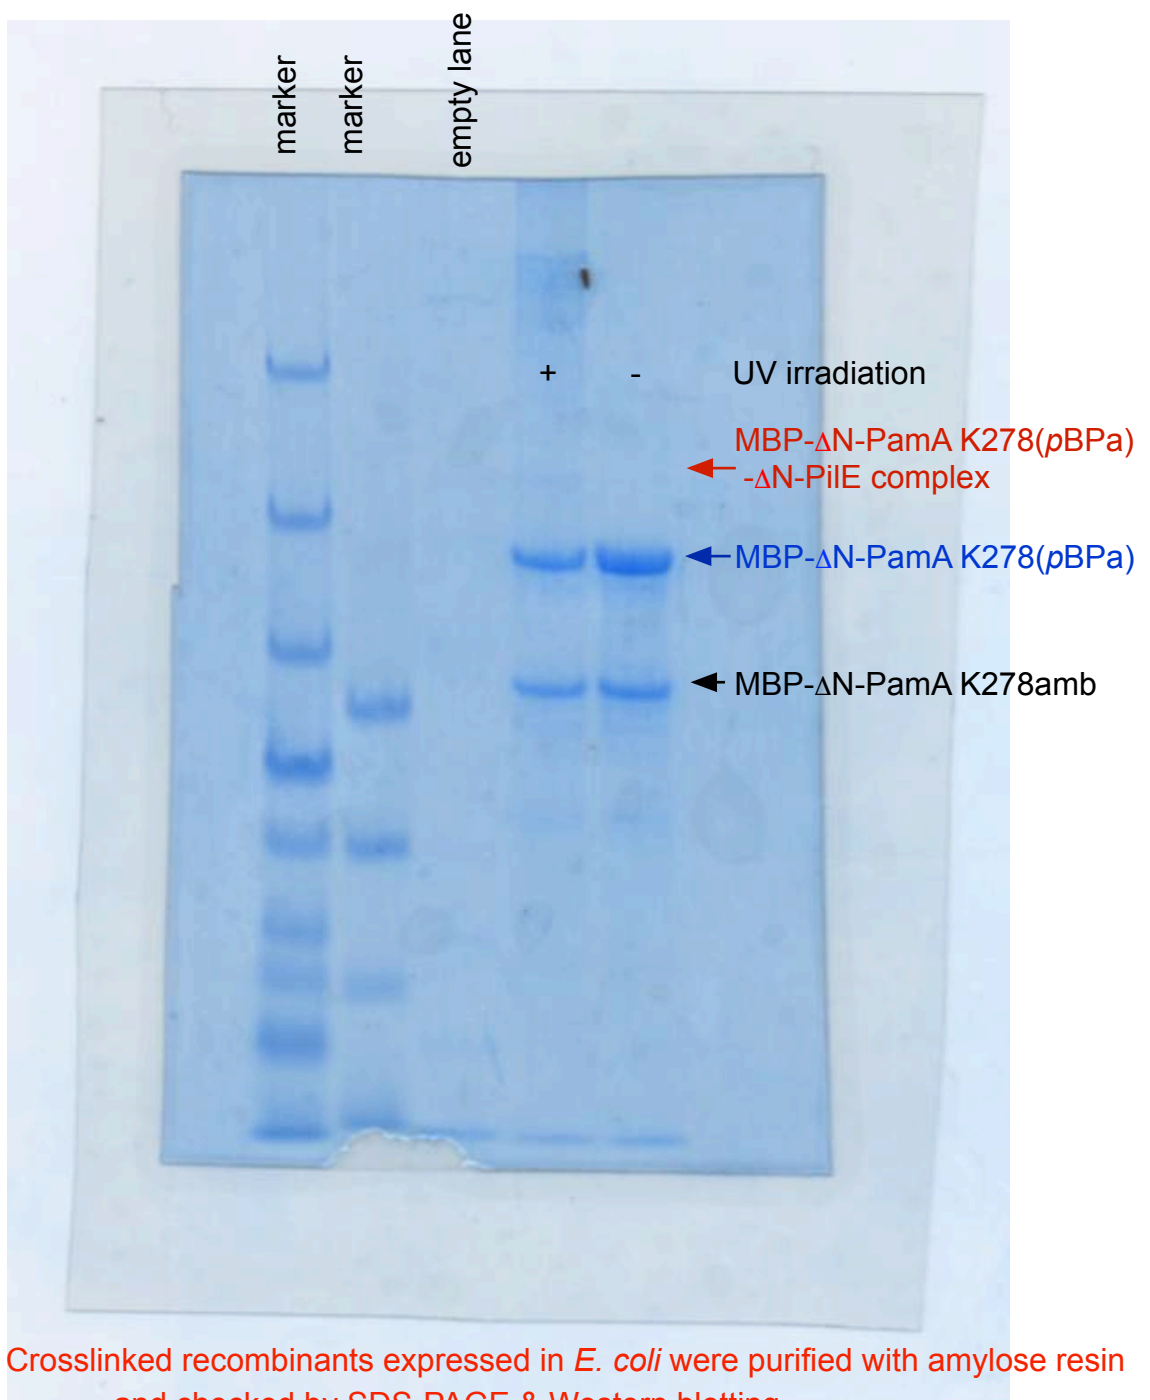

@ Crosslinked recombinants expressed in *E. coli* were purified with amylose resin and checked by SDS-PAGE & Western blotting

@ Detected by staining with CBB

@ Captured by scanner

@ Used by cutting out the left part of the gel

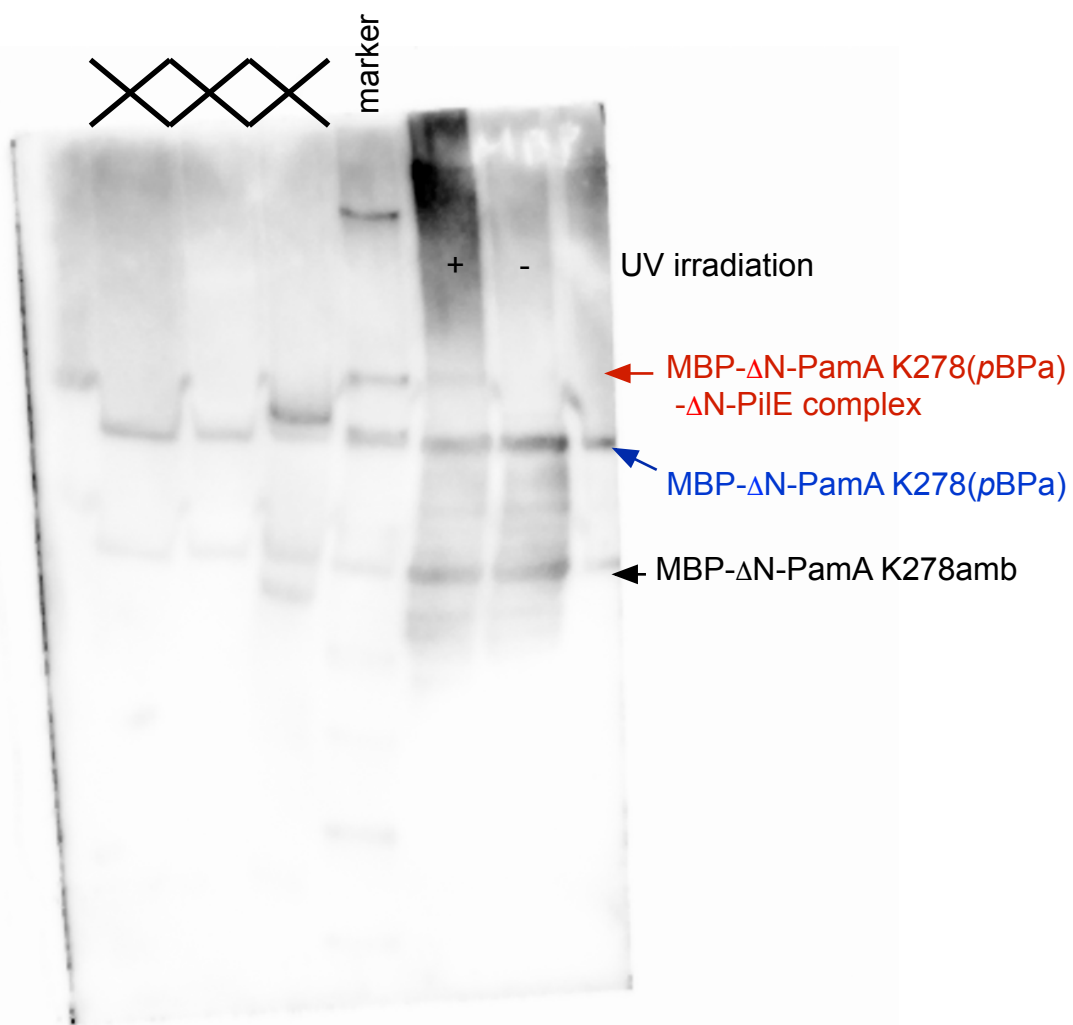

@ Crosslinked recombinants expressed in *E. coli* were purified with amylose resin and checked by SDS-PAGE & Western blotting

@ Detected by staining with anti-MBP mAb & anti-mouse-HRP 2nd antibody

@ Chemiluminescence imaging system: FUSION SOLO 5 (M&S)

@ Used by cutting out the right part of the image



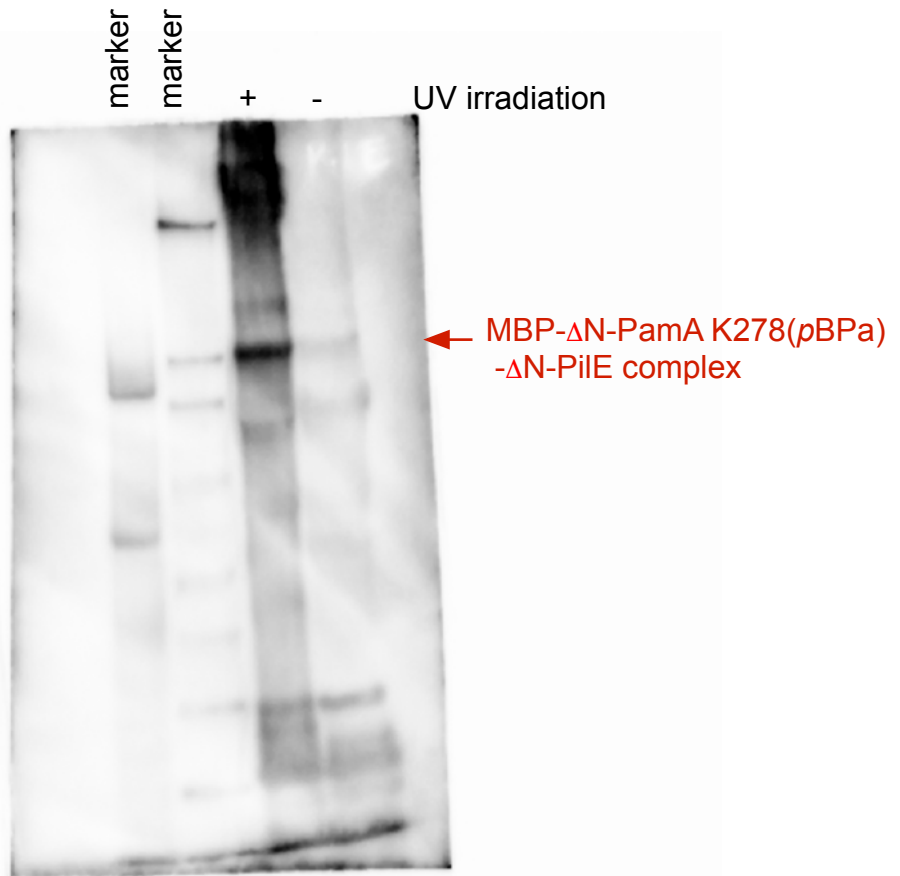

- @ Crosslinked protein recombinants expressed in *E. coli* were purified with amylose resin and checked by SDS-PAGE & Western blotting
- @ Detected with ant-PilE rabbit serum & anti-rabbit-HRP 2nd antibody
- @ Chemiluminescence imaging system: FUSION SOLO 5 (M&S)
- @ Used the entire image
