# Supplementary material for: Genetic incorporation of non-canonical amino acid photocrosslinkers in Neisseria meningitidis: New method provides insights into the physiological function of the function-unknown NMB1345 protein
Source: PLoS One. 2020 Aug 31;15(8):e0237883. doi: 10.1371/journal.pone.0237883 (PMC7458321; doi:10.1371/journal.pone.0237883)
Supplement: S4 Fig — (A) Amino acid sequence of the C-terminal region of PamA K278-Strep2-His6. (B) Nucleotide sequence of the C-terminal region of PamA K278-Strep2-His6. The same colors in A and B corresponds to the same region in amino acid (A) and nucleotide (B) sequences. (PDF) [file pone.0237883.s004.pdf]

**A**

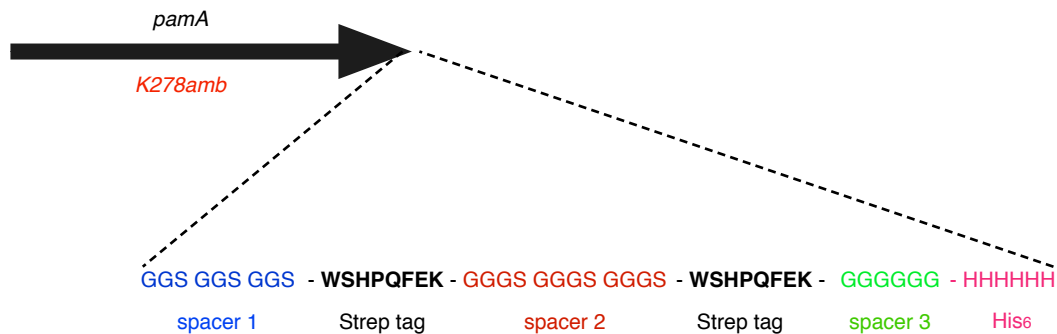

# B

GGTATGGTTTCAGAGCCGCAG GGAGGATCAGGAGGATCAGGAGGATCA

*pamA* coding region spacer 1

TGGAGCCACCCGCAGTTCGAAAAA GGAGGAGGATCAGGAGGAGGATCAGGAGGAGGATCA TGGAGCCACCCGCAGTTCGAAAAA

Strep tag spacer 2 Strep tag

GGAGGAGGAGGAGGAGGA CACCACCACCACCAC TAA GGGTCAAATGCCGTC

spacer 3 His tag STOP *pamA* downstream region
